# Supplementary material for: GC-MS Silylation Derivative Method to Characterise Black BIC® Ballpoint 2-Phenoxyethanol Ratio Evaporation Profile—A Contribution to Ink Ageing Estimation
Source: MDPI journal article supplement (doi:10.3390/molecules28124781), 2023-06-15
Supplement: s1 [file s1]

# **GC-MS Silylation Derivative Method to Characterise Black BIC® Ballpoint 2-Phenoxyethanol Ratio Evaporation Profile—A Contribution to Ink Ageing Estimation**

**Teresa Argente Leal <sup>1</sup>, Carla Ferreira <sup>1,2</sup>, Ana Ribeiro <sup>1</sup>, Samir Marcos Ahmad <sup>1,2</sup>, Alexandre Quintas <sup>1,2,\*</sup> and Alexandra Bernardo <sup>1,2,\*</sup>**

<sup>1</sup> Forensic and Psychological Sciences Laboratory Egas Moniz, Campus Universitário—Quinta da Granja, Monte da Caparica, 2829-511 Caparica, Portugal

<sup>2</sup> Molecular Pathology and Forensic Biochemistry Laboratory, Centro de Investigação Interdisciplinar Egas Moniz (CiiEM), Instituto Universitário Egas Moniz (IUEM), Campus Universitário—Quinta da Granja, Monte da Caparica, 2829-511 Caparica, Portugal

\* Correspondence: [aquintas@egasmoniz.edu.pt](mailto:aquintas@egasmoniz.edu.pt) (A.Q.); [abernardo@egasmoniz.edu.pt](mailto:abernardo@egasmoniz.edu.pt) (A.B.)

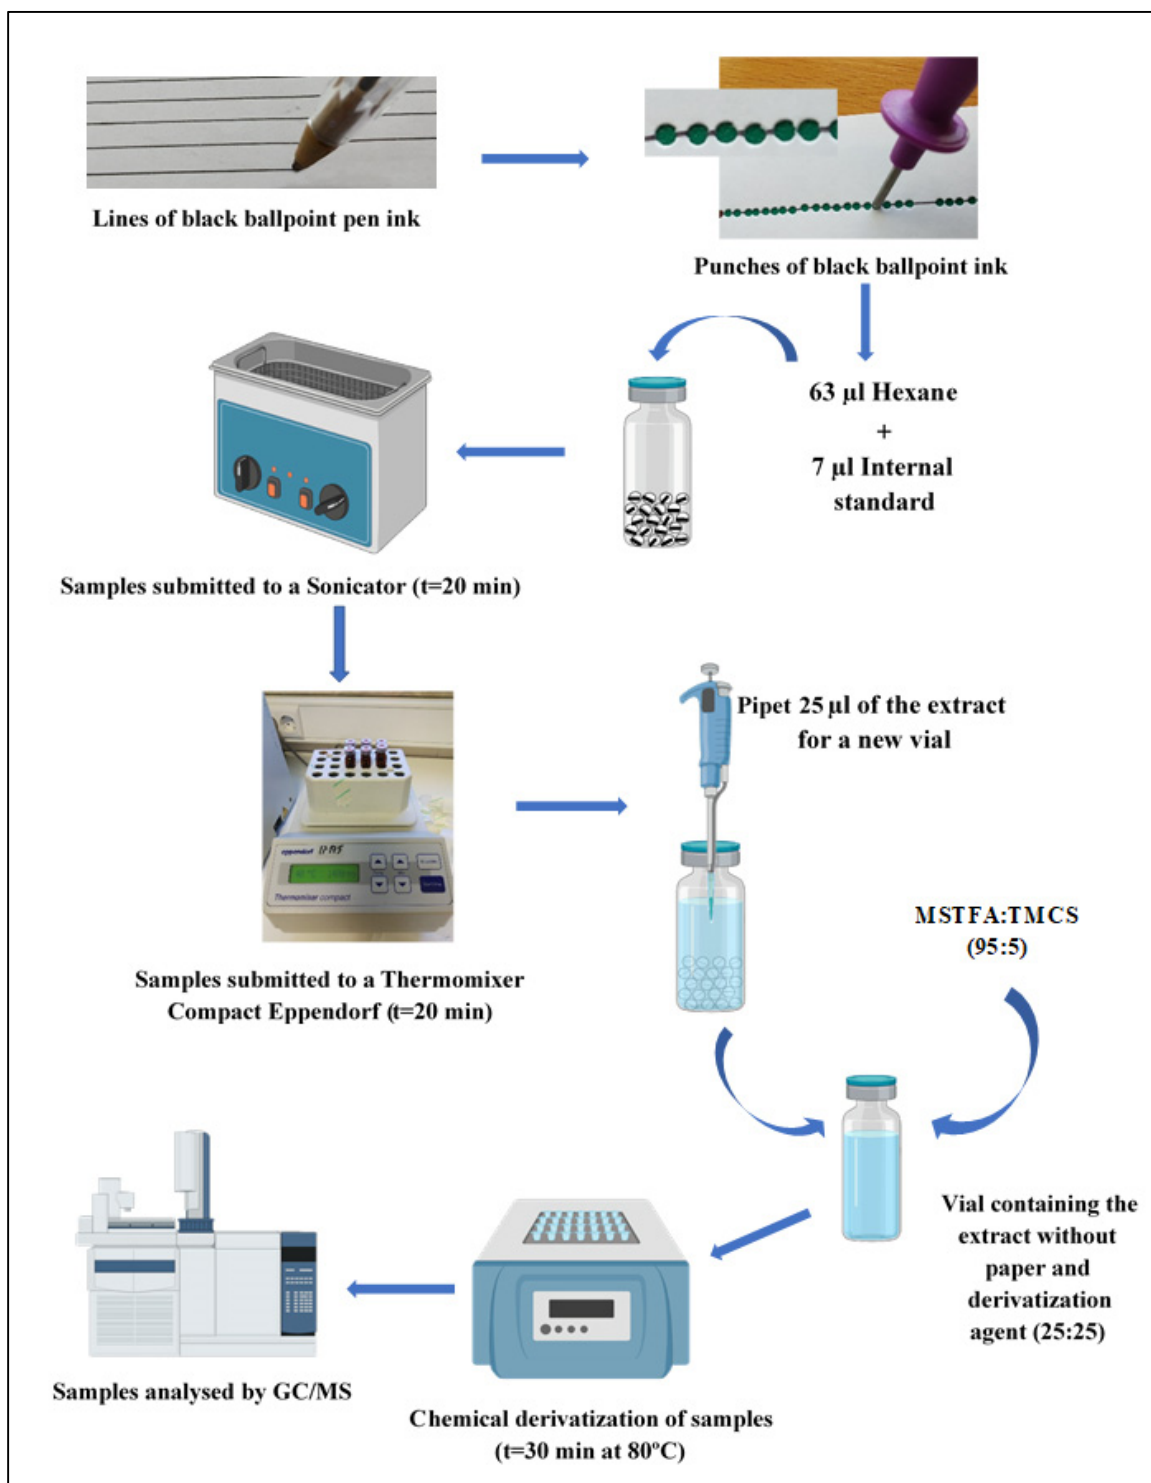

**Figure S1** - Extraction procedure for each ink entry. This procedure was performed for each sample in triplicate.
